# Supplementary material for: First Glimpse on Spring Starflower Domestication
Source: MDPI journal article supplement (doi:10.3390/genes13020243), 2022-01-27
Supplement: s1 [file s1]

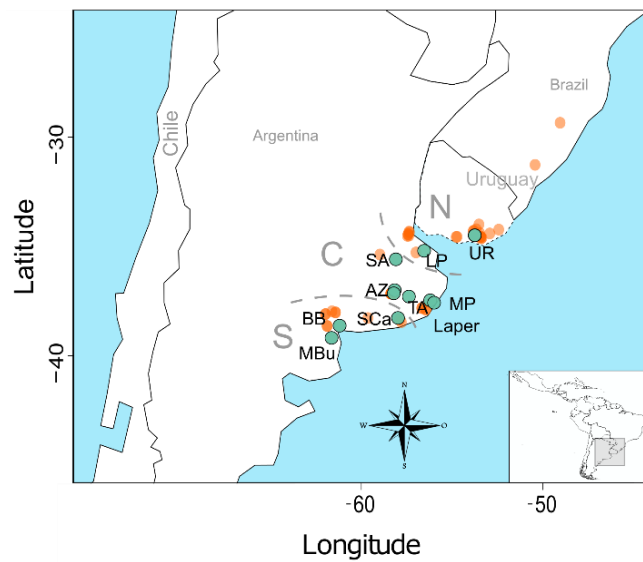

**Figure S1.** Map showing the geographic distribution of the wild populations of *Ipheion uniflorum* used in this study (green dots) and natural distribution of the species (orange dots). N: North; C: Centre; S: South.

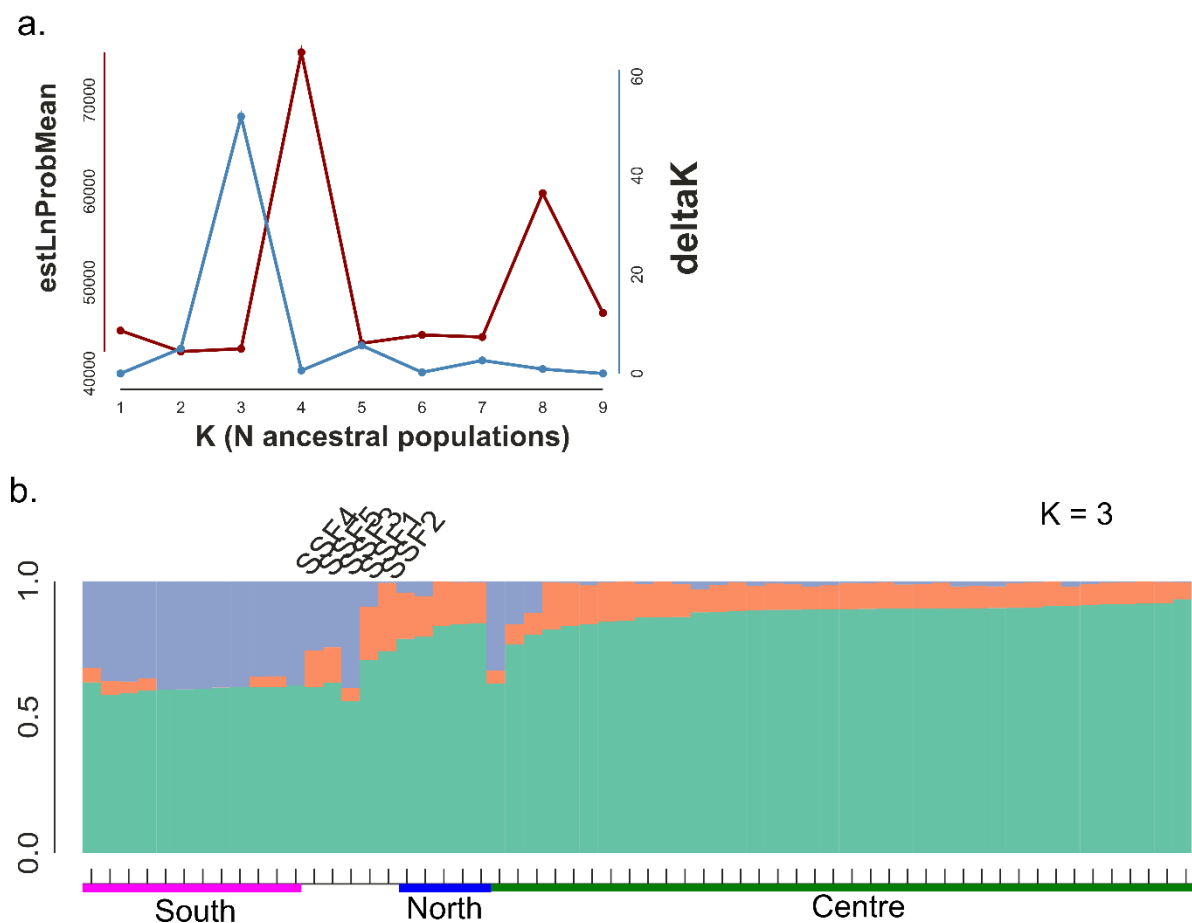

**Figure S2.** Population structure analysis. (a) Evanno's plot of K (number of genetic clusters) against corresponding mean estimated log-normal (Ln) probability of the data (dark red dots) and  $\Delta K$  (light blue dots); (b) Population structure analysis of wild + cultivated *Ipheion uniflorum* specimens ( $n=61$ ) based on  $K=3$  and 2302 unlinked SNPs. Each bar represents one individuals and colored segments represent the relative memberships to each genetic cluster.

**Table S1.** Subsampling of the morphological data.

| Specimen       | Region | Tepal apex | Flower colour | Floral tube length | Outer tepal width | Inner tepal width | Outer tepal length | Inner tepal length |
|----------------|--------|------------|---------------|--------------------|-------------------|-------------------|--------------------|--------------------|
| 502_uniMP_a    | Centre | 1          | 0             | 1                  | 0.52              | 0.32              | 1.9                | 1.8                |
| 502_uniMP_b    | Centre | 0          | 0             | 1.6                |                   |                   | 2.1                |                    |
| 502_uniMP_c    | Centre | 0          | 0             | 0.9                | 0.48              | 0.36              | 2.2                | 2                  |
| 510_uniLP_a    | North  | 0          | 0             | 1.1                | 0.48              | 0.4               | 1.9                | 2                  |
| 510_uniLP_b    | North  | 0          | 0             | 1.1                | 0.504             | 0.44              | 2.1                | 2.1                |
| 510_uniLP_c    | North  | 0          | 0             | 1.3                | 0.808             |                   | 2.4                |                    |
| 513_uniAZ_a    | Centre | 0          | 1             | 1.2                | 0.408             | 0.336             | 1.8                | 1.6                |
| 513_uniAZ_b    | Centre | 0          | 1             | 1.1                | 0.5               | 0.4               | 2.6                | 2.6                |
| 513_uniAZ_c    | Centre | 0          | 0             | 1.1                | 0.576             | 0.496             | 2.5                | 2.3                |
| 540_uniAZ_d    | Centre | 0          | 1             | 1.1                | 0.648             | 0.576             | 2.4                | 2.2                |
| 540_uniAZ_a    | Centre | 0          | 0             | 1.2                | 0.6               | 0.4               | 2.4                | 2.3                |
| 540_uniAZ_b    | Centre | 1          | 0             | 2.1                | 0.44              | 0.6               | 2.4                | 2.5                |
| 540_uniAZ_c    | Centre | 0          | 0             | 1.4                | 0.44              | 0.36              | 2.3                | 2.2                |
| 540_uniAZ_d    | Centre | 0          | 0             | 2.5                | 0.6               | 0.4               | 2.4                | 2.2                |
| 541_uniTA_a    | Centre | 0          | 0             | 1.5                | 0.68              | 0.56              | 2.6                | 2.7                |
| 541_uniTA_b    | Centre | 0          | 0             | 1                  | 0.48              | 0.511             | 2.3                | 2.1                |
| 541_uniTA_c    | Centre | 0          | 0             | 1                  | 0.6               | 0.7               | 2.6                | 2.6                |
| 551_uniTA_a    | Centre | 0          | 0             | 1.2                | 0.64              | 0.48              | 2.6                | 2.5                |
| 551_uniTA_b    | Centre | 0          | 0             | 1.5                | 0.416             | 0.336             | 2.4                | 2.5                |
| 551_uniTA_c    | Centre | 0          | 0             | 1.2                | 0.68              | 0.44              | 1.6                | 1.5                |
| 551_uniTA_d    | Centre | 0          | 0             | 1.1                |                   |                   |                    |                    |
| 551_uniTA_e    | Centre | 1          | 0             | 1.1                | 0.68              | 0.6               | 2.3                | 2.2                |
| 555_uniTA_a    | Centre | 0          | 0             | 1.3                | 0.816             | 0.816             | 2.6                | 2.5                |
| 555_uniTA_b    | Centre | 0          | 0             | 1.2                | 0.5               | 0.6               | 2.7                | 3                  |
| 555_uniTA_c    | Centre | 0          | 1             | 1.3                | 0.5               | 0.6               | 2.6                | 2.5                |
| 555_uniTA_d    | Centre | 0          | 2             | 1.3                | 0.4               | 0.32              | 2.2                | 2.3                |
| 567_uniLaper_a | Centre | 0          | 0             | 1.2                | 0.32              | 0.36              | 2.2                | 2.3                |
| 567_uniLaper_b | Centre | 0          | 0             | 1.6                | 0.4               | 0.44              | 2.8                | 2.7                |
| 567_uniLaper_c | Centre | 0          | 0             | 1.3                | 0.4               | 0.36              | 2                  | 1.9                |
| 567_uniLaper_d | Centre | 1          | 0             | 1.2                | 0.44              | 0.32              | 1.6                | 1.6                |
| 567_uniLaper_a | Centre | 1          | 0             | 1.1                | 0.56              | 0.48              | 2.5                | 2.4                |
| 567_uniLaper_b | Centre | 0          | 0             | 1.1                | 0.464             | 0.48              | 2.1                | 2.1                |
| uniUR          | North  | 0          | 0             | 1.2                | 0.576             | 0.44              | 2.2                | 2.1                |
| uniSA_a        | Centre | 0          | 0             | 1                  | 0.8               | 0.48              | 2.4                | 2.6                |
| uniSA_b        | Centre | 0          | 1             | 2.2                | 0.88              | 0.52              | 2.3                | 2.6                |
| uniSA_c        | Centre | 0          | 0             | 1                  | 0.44              | 0.6               | 2.3                | 2.6                |

Codification: Tepal apex: 0: obtuse, 1: acute; 2: round. Flower color: 0: white; 1: blue/light blue; 2: pink or lilac; 3: violet.

**Table S2.** Summary of quantitative and qualitative morphological data portraying the variation found among natural and cultivated specimens of *Ipheion uniflorum*.

| Condition  | Tepal apex | Flower colour | Tepal width | Tepal length | Plant size  |
|------------|------------|---------------|-------------|--------------|-------------|
| natural    | 0/1/2      | 0/1/2         | 0.3-1.1 cm  | 2-3 cm       | 6-20 cm     |
| cultivated | 0/1/2      | 0/1/2/3       | 0.5-1.1 cm  | 2-4 cm       | 7-30(40) cm |

Data from natural populations: [9, 10]. Data from cultivated samples: [11, 12] and descriptive information provided by shops offering bulbs of SSF. Character codification follows Sassone et al. [19].
